# Supplementary material
Source: PubMed Central journal article supplement (PMC9356079)
Supplement: mmc1.pdf [file mmc1.pdf]

## **Supplemental information**

### **Vaccine-induced spike- and nucleocapsid-specific cellular responses maintain potent cross-reactivity to SARS-CoV-2 Delta and Omicron variants**

**Flavia Chiuppesi, John A. Zaia, Katelyn Faircloth, Daisy Johnson, Minh Ly, Veronica Karpinski, Corinna La Rosa, Jennifer Drake, Joan Marcia, Ann Marie Acosta, Shannon Dempsey, Randy A. Taplitz, Qiao Zhou, Yoonsuh Park, Sandra Ortega Francisco, Teodora Kaltcheva, Paul H. Frankel, Steven Rosen, Felix Wussow, Sanjeet Dadwal, and Don J. Diamond**

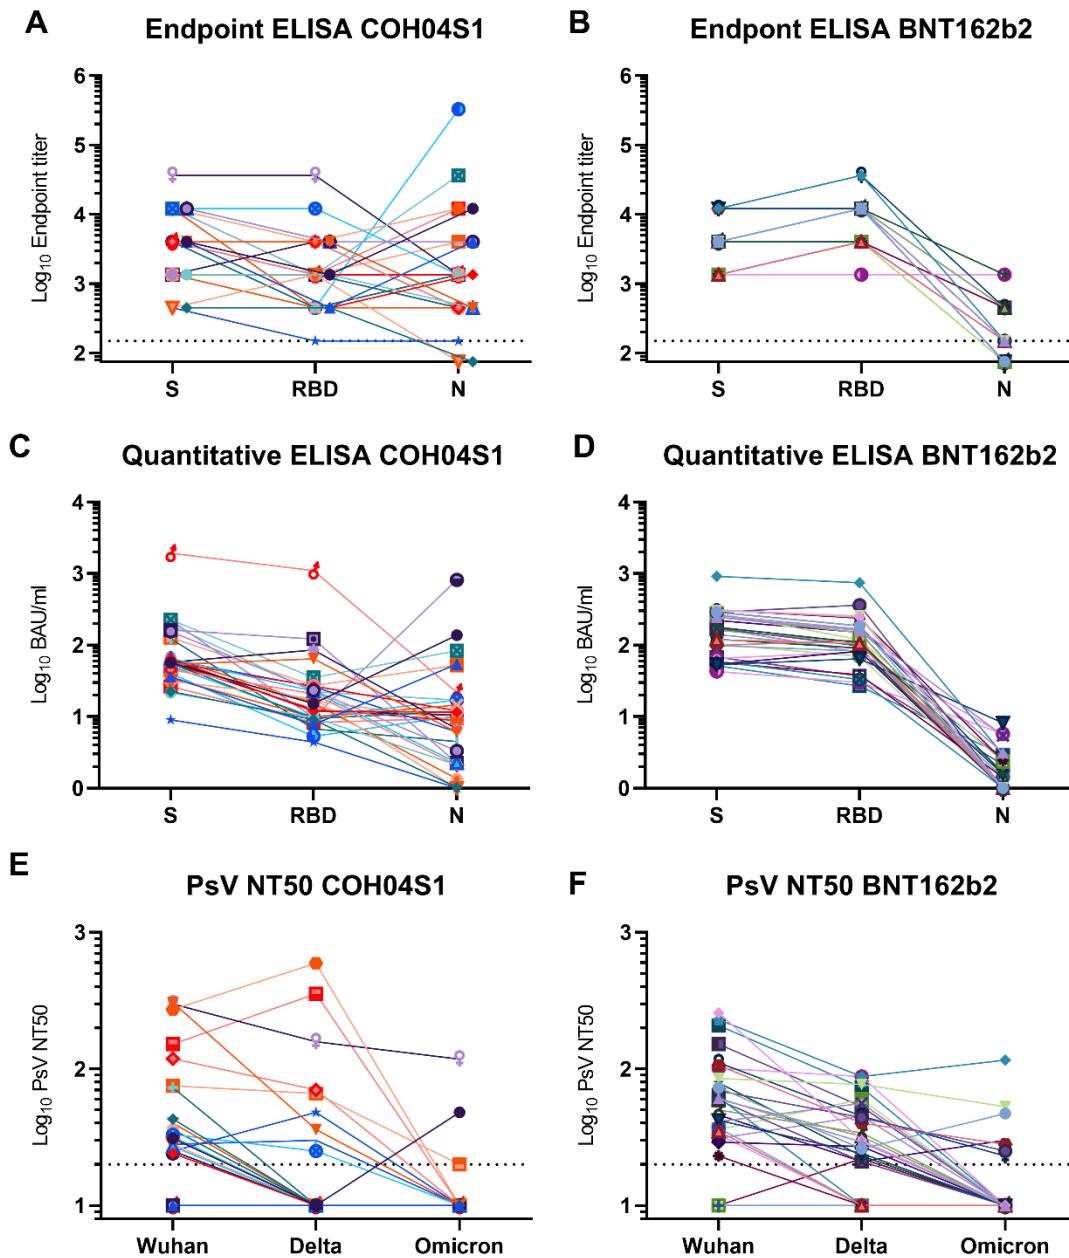

**Figure S1. Related to Figure 1. SARS-CoV-2 antigen-specific binding antibodies and VOC-specific neutralizing antibodies in COH04S1 and BNT162b2 vaccinees six months or more after primary vaccination. a-d.** Binding antibody titers to spike (S), receptor binding domain (RBD), and nucleocapsid (N) were measured by endpoint (A-B) and quantitative (C-D) ELISA in serum samples from COH04S1- (A, C) and BNT162b2- (B, D) vaccinated subjects six months or more after the primary vaccination series. Shown are the individual measurements spanning across SARS-CoV-2 antigens. Dotted lines in A-B represent the lower limit of quantifications. Samples with titers below the limit of quantification were indicated with an endpoint titer of 75. **E-F.** 50% neutralizing antibody titers (NT50) against ancestral SARS-CoV-2 (Wuhan-Hu-1), Delta and Omicron variants were measured using a pseudovirus (PsV) assay in serum samples from

COH04S1- (E) and BNT162b2- (F) vaccinated subjects six months or more after the primary vaccination series. Shown are the individual measurements spanning across SARS-CoV-2 variants. Dotted lines represent the lower limit of quantification. Samples with titers below the limit of quantification were indicated with an NT50 titer of 10.

**A****S Endpoint to BAU/ml correlation**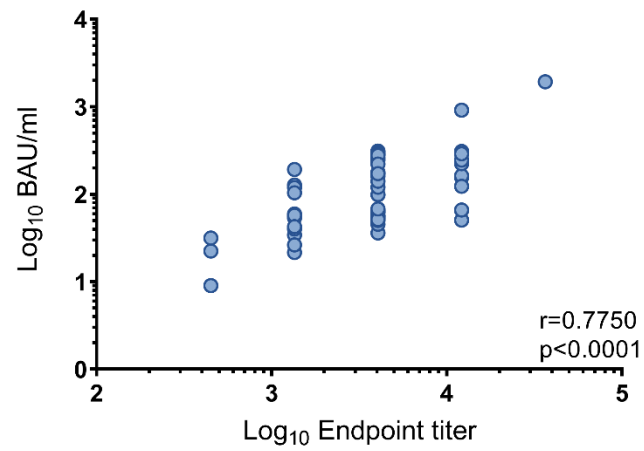**B****RBD Endpoint to BAU/ml correlation**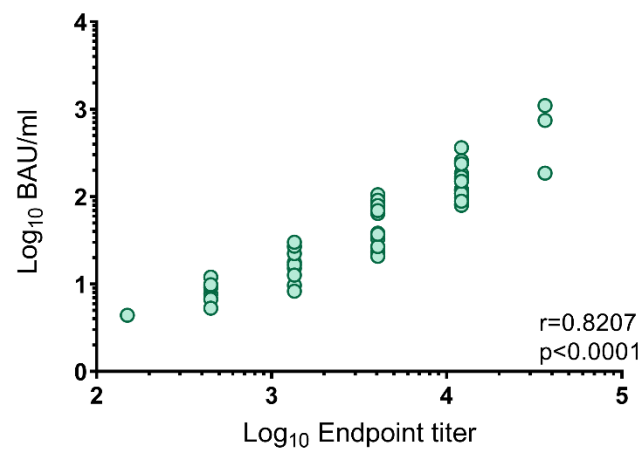**C****N Endpoint to BAU/ml correlation**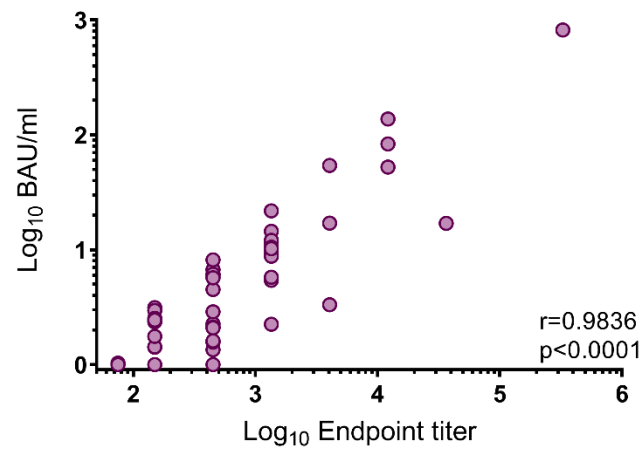

**Figure S2. Related to Figure 1. Correlation of SARS-CoV-2 antigen-specific endpoint titers to binding antibody units in COH04S1 and BNT162b2 vaccinees six months or more after primary vaccination.** Binding antibody titers to spike (S), receptor binding domain (RBD), and nucleocapsid (N) were measured by endpoint and quantitative ELISA in serum samples from COH04S1- and BNT162b2-vaccinated subjects six months or more after the primary vaccination series. Shown is the correlation analysis of S (A), RBD (B), and N (C) IgG endpoint titers to binding antibody units (BAU/ml). Shown in each figure is two-tailed Pearson's correlation coefficient ( $r$ ) and its significance ( $p$ ).

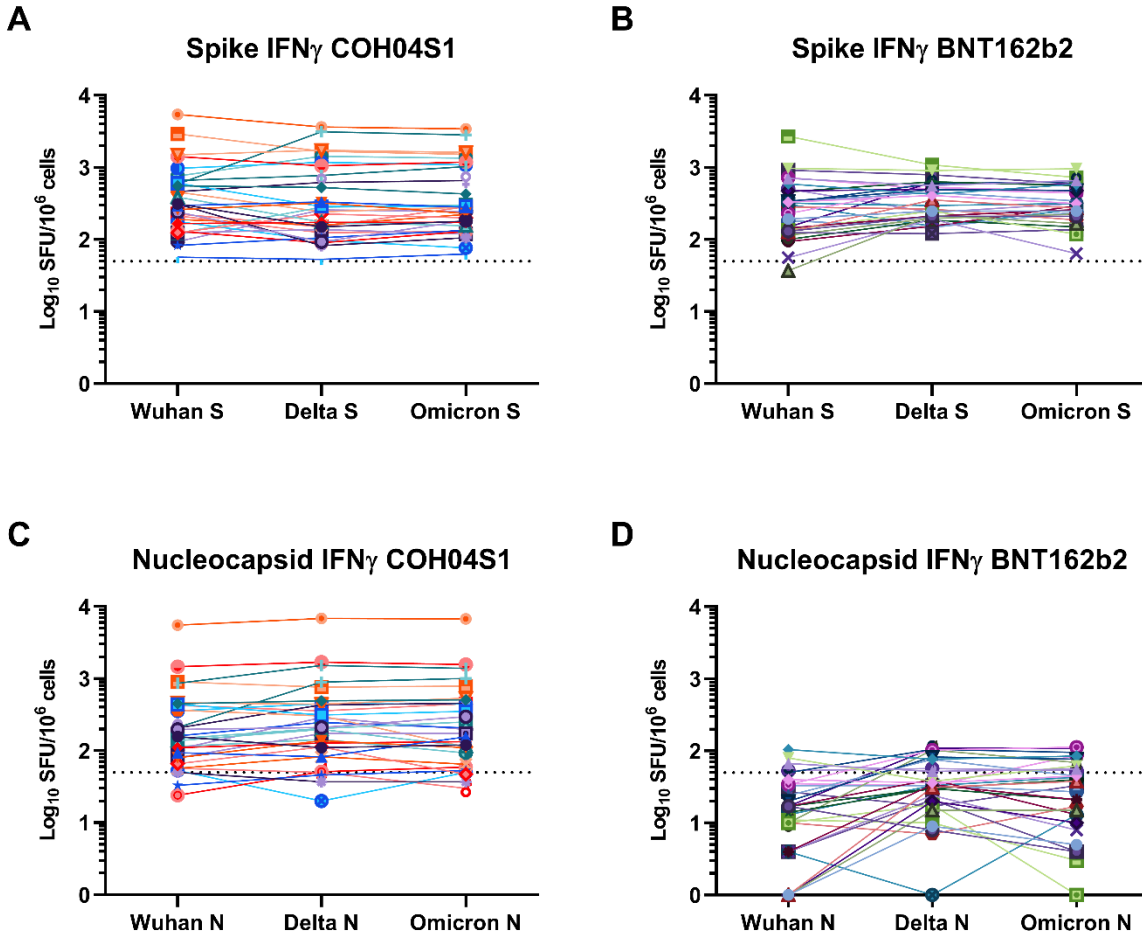

**Figure S3. Related to Figure 2. SARS-CoV-2 ancestral and variant-specific IFN $\gamma$  T cell responses in COH04S1 and BNT162b2 vaccinees six months or more after primary vaccination.** Ancestral (Wuhan-Hu-1), Delta, and Omicron-specific spike (A, B) and nucleocapsid (C, D) IFN $\gamma$  T cell responses were quantified by IFN $\gamma$  ELISPOT upon PBMCs stimulation with S and N peptide libraries in subjects vaccinated with COH04S1 (A, C) or BNT162b2 (B, D) six months or more after the primary vaccination series. Shown are the individual IFN $\gamma$  spot forming units (SFU) measured in  $10^6$  PBMCs and spanning across SARS-CoV-2 variants. Dotted lines represent the arbitrary threshold for positive response (50 spots/ $10^6$  PBMCs).

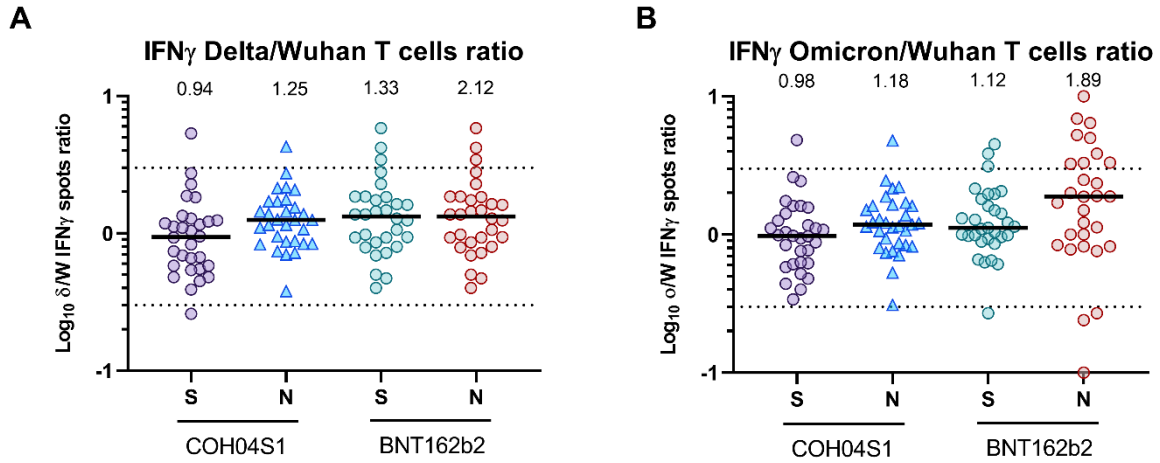

**Figure S4. Related to Figure 2. Ratios of variant-specific to ancestral-specific IFN $\gamma$  T cell responses in COH04S1 and BNT162b2 vaccinees six months or more after primary vaccination.** Delta to Ancestral (Wuhan-Hu-1, A), and Omicron to ancestral (B) spike and nucleocapsid IFN $\gamma$  T cell responses were quantified by IFN $\gamma$  ELISPOT upon PBMCs stimulation with S and N peptide libraries in subjects vaccinated with COH04S1 or BNT162b2 six months or more after the primary vaccination series. Shown are IFN $\gamma$  spot forming units (SFU) ratios. Bars represent medians with median values indicated above each group. Top dotted line represents a three-fold increase and the bottom dotted line represents a three-fold decrease in the ratio.

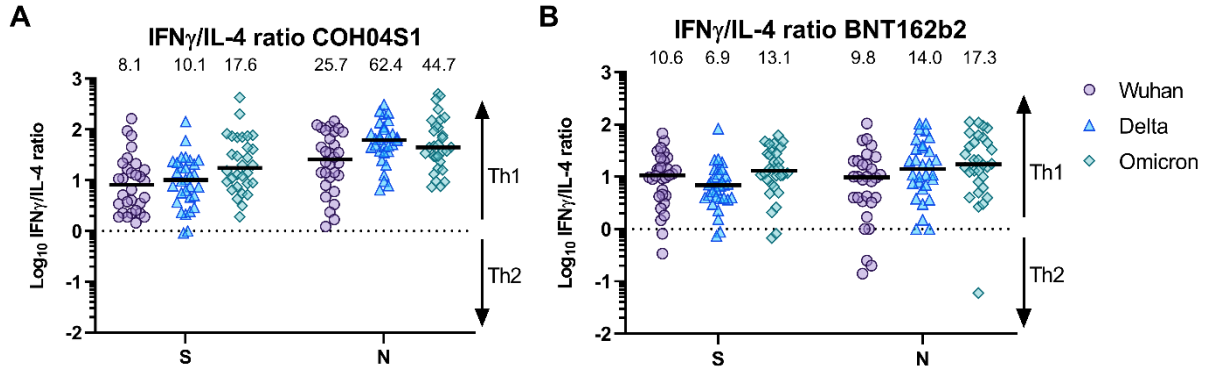

**Figure S5. Related to Figure 2. Ratios of ancestral-specific IFN $\gamma$  to IL-4 T cell responses in COH04S1 and BNT162b2 vaccinees six months or more after primary vaccination.** Ancestral (Wuhan-Hu-1) specific spike and nucleocapsid IFN $\gamma$  to IL-4 T cell ratios were quantified by IFN $\gamma$  ELISPOT upon PBMCs stimulation with S and N peptide libraries in subjects vaccinated with COH04S1 (A) or BNT162b2 (B) six months or more after the primary vaccination series. Shown are IFN $\gamma$  spot forming units (SFU) ratios. Bars represent medians with median values indicated above each group. Dotted line represents a ratio of 1. A ratio >1 is indicative of a Th1-biased response.

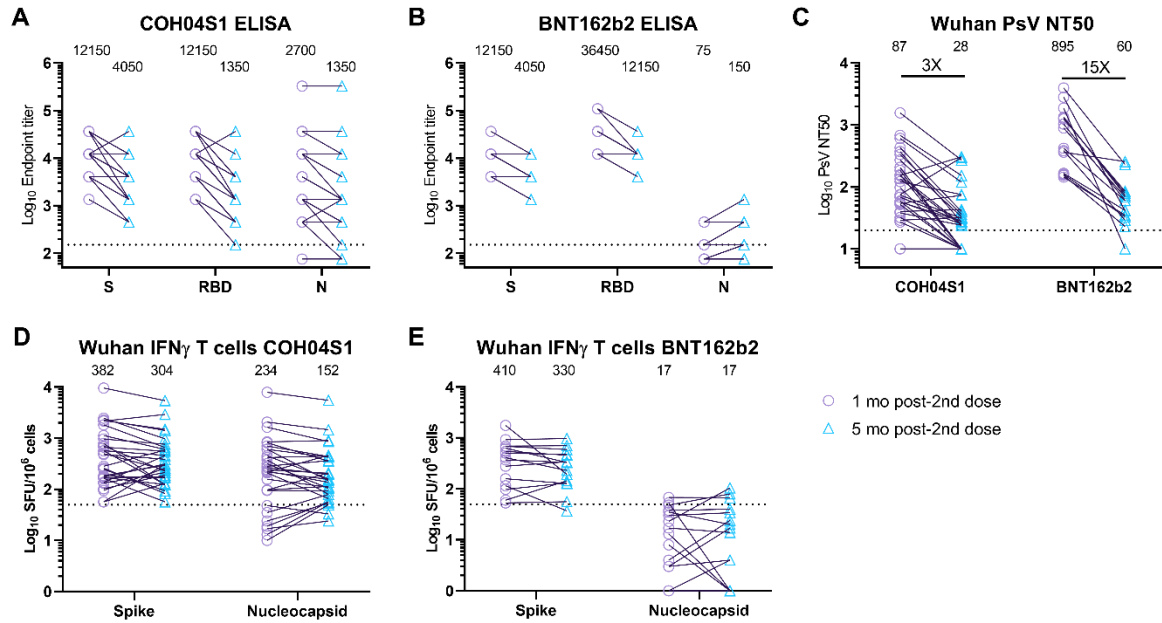

**Figure S6. Related to Figures 1 and 2. Comparison of SARS-CoV-2-specific humoral and cellular responses in COH04S1 and BNT162b2 vaccinees one month and five months after the second vaccination. A-B.** Binding antibodies. Binding antibody titers to Wuhan-Hu-1-specific spike (S), receptor binding domain (RBD), and nucleocapsid (N) antigens were measured by endpoint ELISA in serum samples of COH04S1- (A) and BNT162b2- (B) vaccinated subjects one month and five months after the second vaccination. **C.** NAb responses. 50% neutralizing antibody titers (NT50) against ancestral SARS-CoV-2 (Wuhan-Hu-1) were measured using a pseudovirus (PsV) assay in serum samples of COH04S1- and BNT162b2-vaccinated subjects one month and five months after the second dose. Samples with titers below the limit of quantification were indicated with an NT50 titer of 10. Dotted lines in A-C represents the lower limit of quantification. **D-E.** Cellular responses. Ancestral (Wuhan-Hu-1)-specific S and N IFN $\gamma$  T cell responses were quantified by IFN $\gamma$  upon PBMCs stimulation with S and N peptide libraries in subjects vaccinated with COH04S1 (D) or BNT162b2 (E) one month after and five months after the second vaccination. Shown are the IFN $\gamma$  spot forming units (SFU) measured in 10<sup>6</sup> PBMCs. Dotted lines represent the arbitrary threshold for positive response (50 spots/10<sup>6</sup> PBMCs). For BNT162b2, only the 15 subjects that had available samples from both timepoints are included. Median values are indicated above each group.

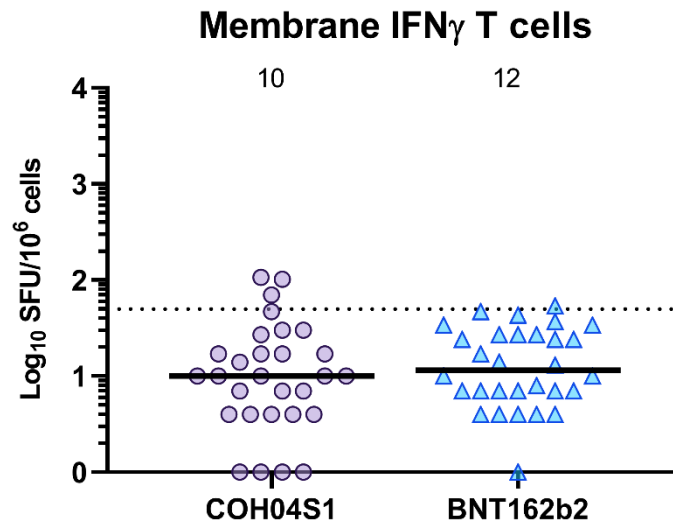

**Figure S7. Related to Figure 2. SARS-CoV-2 membrane-specific T cell responses in COH04S1 and BNT162b2 vaccinees six months or more after primary vaccination.** Ancestral (Wuhan-Hu-1)-specific Membrane IFN $\gamma$  T cell responses were quantified by IFN $\gamma$  ELISPOT upon PBMCs stimulation with an M peptide library in subjects vaccinated with COH04S1 or BNT162b2 six months or more after the primary vaccination series. Shown are the IFN $\gamma$  spot forming units (SFU) measured in 10<sup>6</sup> PBMCs. Bars represent medians and median values are indicated above each group. Dotted line represents the arbitrary threshold for positive response (50 spots/10<sup>6</sup> PBMCs).

Table S1. Related to Figures 1-3. Volunteers characteristics

| Characteristic                    | COH04S1,<br>N = 30 | DL1,<br>N = 18   | DL2,<br>N = 6    | DL3,<br>N = 6    | BNT162b2,<br>N = 30 |
|-----------------------------------|--------------------|------------------|------------------|------------------|---------------------|
| Age <sup>1</sup>                  | 38 (22, 54)        | 44 (22, 50)      | 36 (28, 54)      | 29 (25, 41)      | 56 (24, 75)         |
| Gender                            |                    |                  |                  |                  |                     |
| Female <sup>2</sup>               | 16 (53%)           | 10 (56%)         | 3 (50%)          | 2 (33%)          | 22 (73%)            |
| Male <sup>2</sup>                 | 14 (47%)           | 8 (44%)          | 3 (50%)          | 4 (67%)          | 8 (27%)             |
| Days from first dose <sup>1</sup> | 180<br>(180-242)   | 180<br>(180-242) | 180<br>(180-180) | 180<br>(180-180) | 209<br>(180-405)    |

<sup>1</sup>Median (Range); <sup>2</sup>n (%). DL= dose level

Table S2. Related to Figures 1-3. Individual characteristics of subjects vaccinated with COH04S1

| ID#    | Age (y) | Sex at birth | Days post dose 1 | COH04S1 DL |
|--------|---------|--------------|------------------|------------|
| COH001 | 48      | F            | 180              | DL1        |
| COH002 | 42      | M            | 180              | DL1        |
| COH003 | 45      | F            | 180              | DL1        |
| COH004 | 28      | F            | 180              | DL1        |
| COH006 | 42      | M            | 180              | DL1        |
| COH007 | 28      | M            | 180              | DL2        |
| COH013 | 38      | F            | 180              | DL2        |
| COH014 | 54      | F            | 180              | DL2        |
| COH016 | 48      | F            | 180              | DL1        |
| COH017 | 29      | M            | 180              | DL2        |
| COH018 | 48      | M            | 180              | DL1        |
| COH019 | 34      | F            | 180              | DL2        |
| COH021 | 50      | M            | 180              | DL1        |
| COH022 | 41      | M            | 180              | DL3        |
| COH023 | 30      | F            | 242              | DL1        |
| COH027 | 26      | F            | 180              | DL3        |
| COH028 | 34      | M            | 180              | DL3        |
| COH030 | 25      | M            | 180              | DL1        |
| COH033 | 22      | F            | 208              | DL1        |
| COH034 | 44      | F            | 208              | DL1        |
| COH036 | 28      | M            | 180              | DL3        |
| COH037 | 29      | F            | 180              | DL3        |
| COH039 | 50      | F            | 180              | DL1        |
| COH044 | 44      | F            | 208              | DL1        |
| COH045 | 30      | F            | 180              | DL1        |
| COH046 | 43      | F            | 180              | DL1        |
| COH047 | 38      | M            | 208              | DL1        |
| COH051 | 47      | M            | 180              | DL1        |
| COH058 | 38      | M            | 180              | DL2        |
| COH060 | 25      | M            | 180              | DL3        |

y=years; DL=dose level

Table S3. Related to Figures 1-3. Individual characteristics of subjects vaccinated with BNT162b2

| ID#    | Age (y) | Sex at birth | Days post dose 1 |
|--------|---------|--------------|------------------|
| EUA001 | 34      | F            | 180              |
| EUA002 | 38      | F            | 180              |
| EUA003 | 53      | M            | 180              |
| EUA004 | 48      | M            | 180              |
| EUA006 | 54      | F            | 180              |
| EUA007 | 24      | M            | 180              |
| EUA009 | 56      | F            | 180              |
| EUA010 | 66      | F            | 180              |
| EUA011 | 37      | M            | 180              |
| EUA012 | 61      | F            | 180              |
| EUA014 | 52      | F            | 180              |
| EUA016 | 42      | F            | 180              |
| EUA017 | 50      | F            | 180              |
| EUA018 | 40      | F            | 180              |
| EUA019 | 50      | F            | 180              |
| EUA021 | 60      | F            | 263              |
| EUA023 | 56      | F            | 289              |
| EUA024 | 60      | F            | 281              |
| EUA027 | 56      | F            | 257              |
| EUA028 | 57      | F            | 280              |
| EUA029 | 56      | F            | 265              |
| EUA030 | 64      | M            | 238              |
| EUA035 | 61      | M            | 281              |
| EUA038 | 61      | F            | 312              |
| EUA041 | 62      | M            | 241              |
| EUA044 | 59      | F            | 405              |
| EUA048 | 75      | F            | 283              |
| EUA049 | 56      | F            | 399              |
| EUA050 | 57      | M            | 380              |
| EUA054 | 63      | F            | 378              |

y=years
